# Supplementary material
Source: ML conference proceedings conference paper supplement (https://openaccess.thecvf.com/content/CVPR_2019/html/Qiao_MirrorGAN_Learning_Text-To-Image_CVPR_2019_paper.html)
Supplement: Supplementary file 1 [file Qiao_MirrorGAN_Learning_Text-To-Image_CVPR_2019_supplemental.pdf]

# MirrorGAN: Learning Text-to-image Generation by Redescription

Tingting Qiao<sup>1,3</sup>, Jing Zhang<sup>2,3,\*</sup>, Duanqing Xu<sup>1,\*</sup>, and Dacheng Tao<sup>3</sup>

<sup>1</sup>College of Computer Science and Technology, Zhejiang University, China

<sup>2</sup>School of Automation, Hangzhou Dianzi University, China

<sup>3</sup>UBTECH Sydney AI Centre, School of Computer Science, FEIT, The University of Sydney, Australia

qiaott@zju.edu.cn, jing.zhang@uts.edu.au, xdq@zju.edu.cn, dacheng.tao@sydney.edu.au

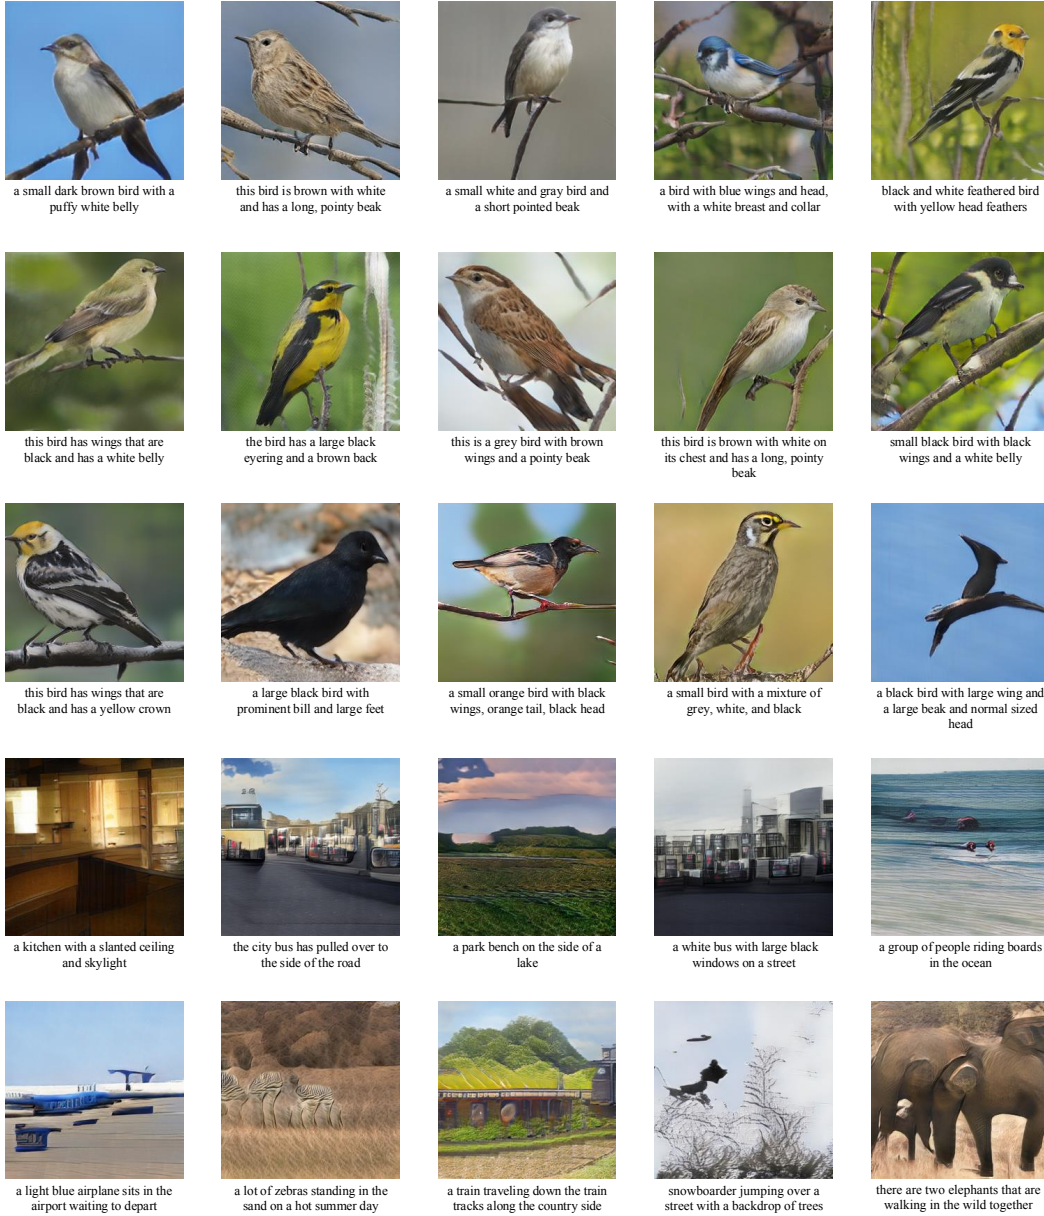

Figure 1: Examples of images generated by MirrorGAN conditioned on text descriptions from CUB and COCO test sets (the supplementary material for Figure 3). As mentioned in [33,37], the COCO dataset is known to be much more challenging than the CUB dataset as it consists of images with more complex scenarios and objects.

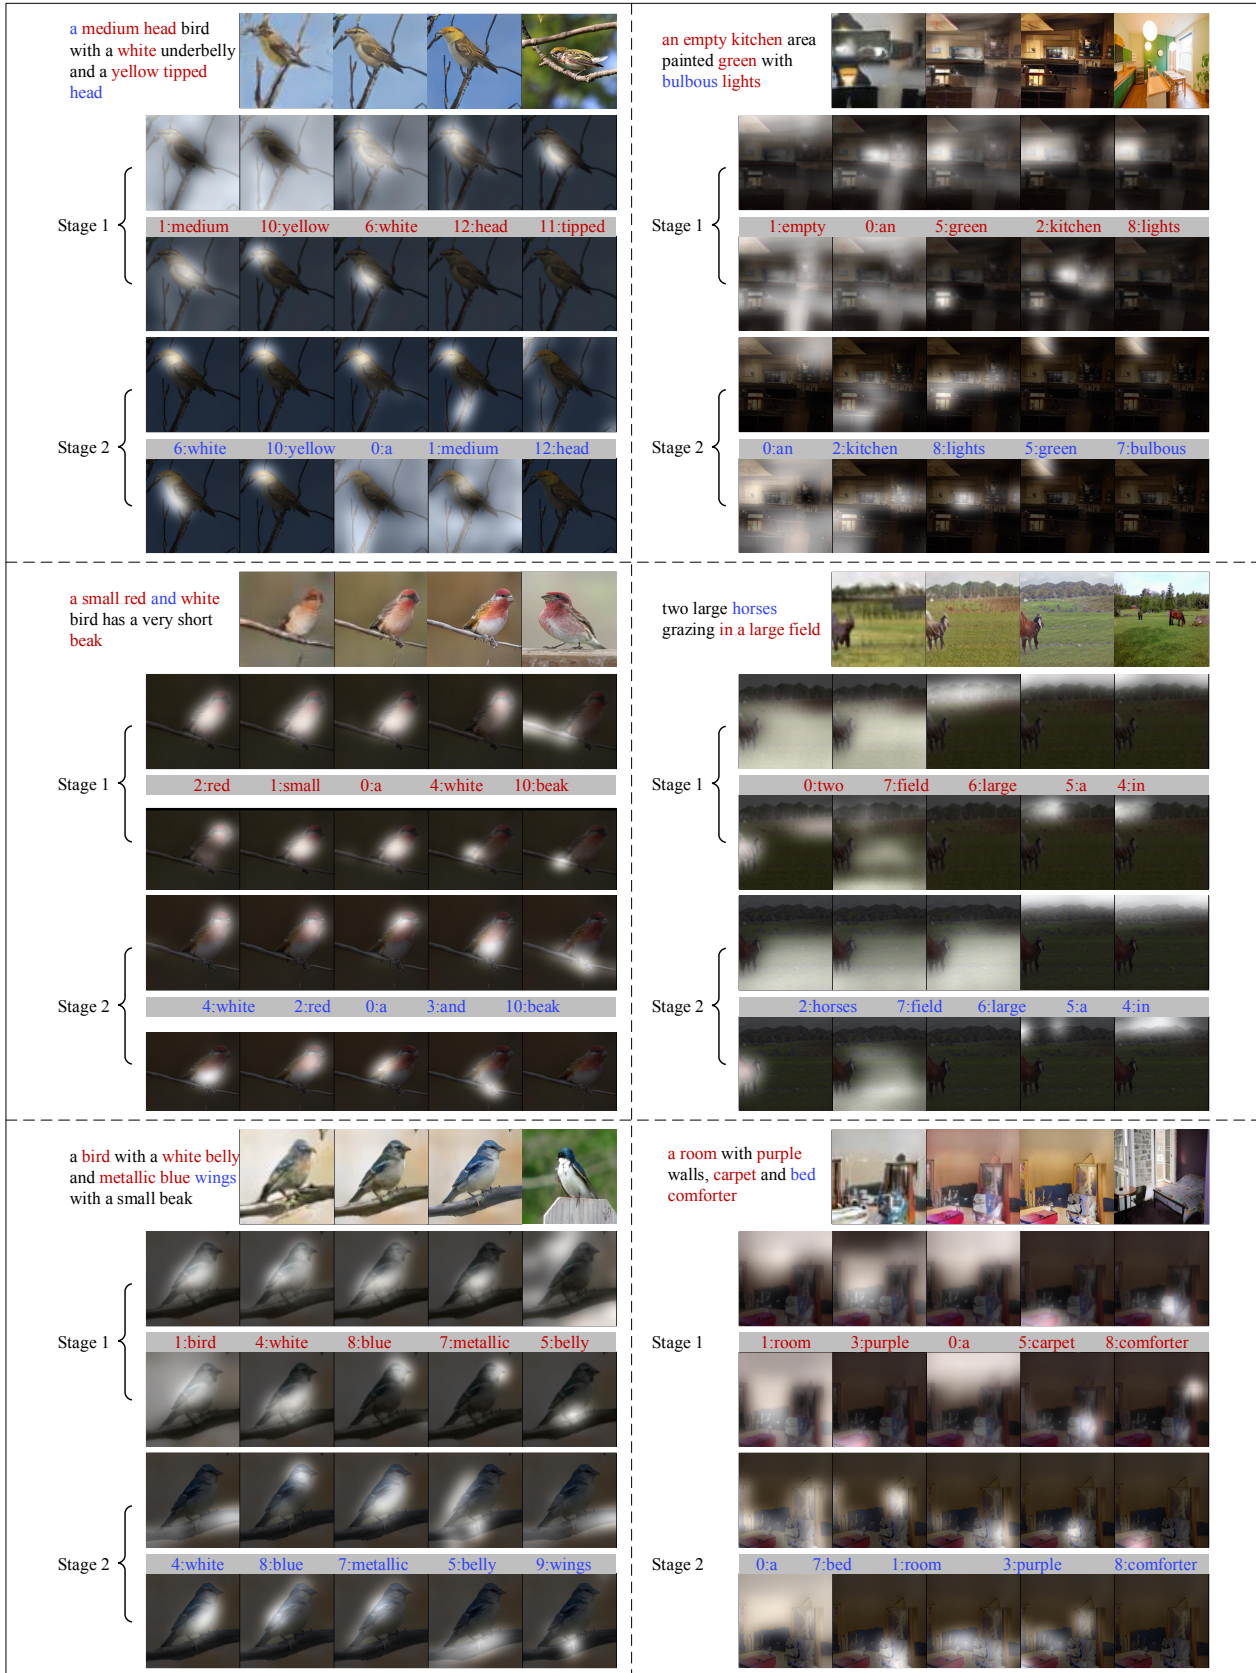

Figure 2: Attention visualization on the CUB and the COCO test sets (the supplementary material for Figure 5).



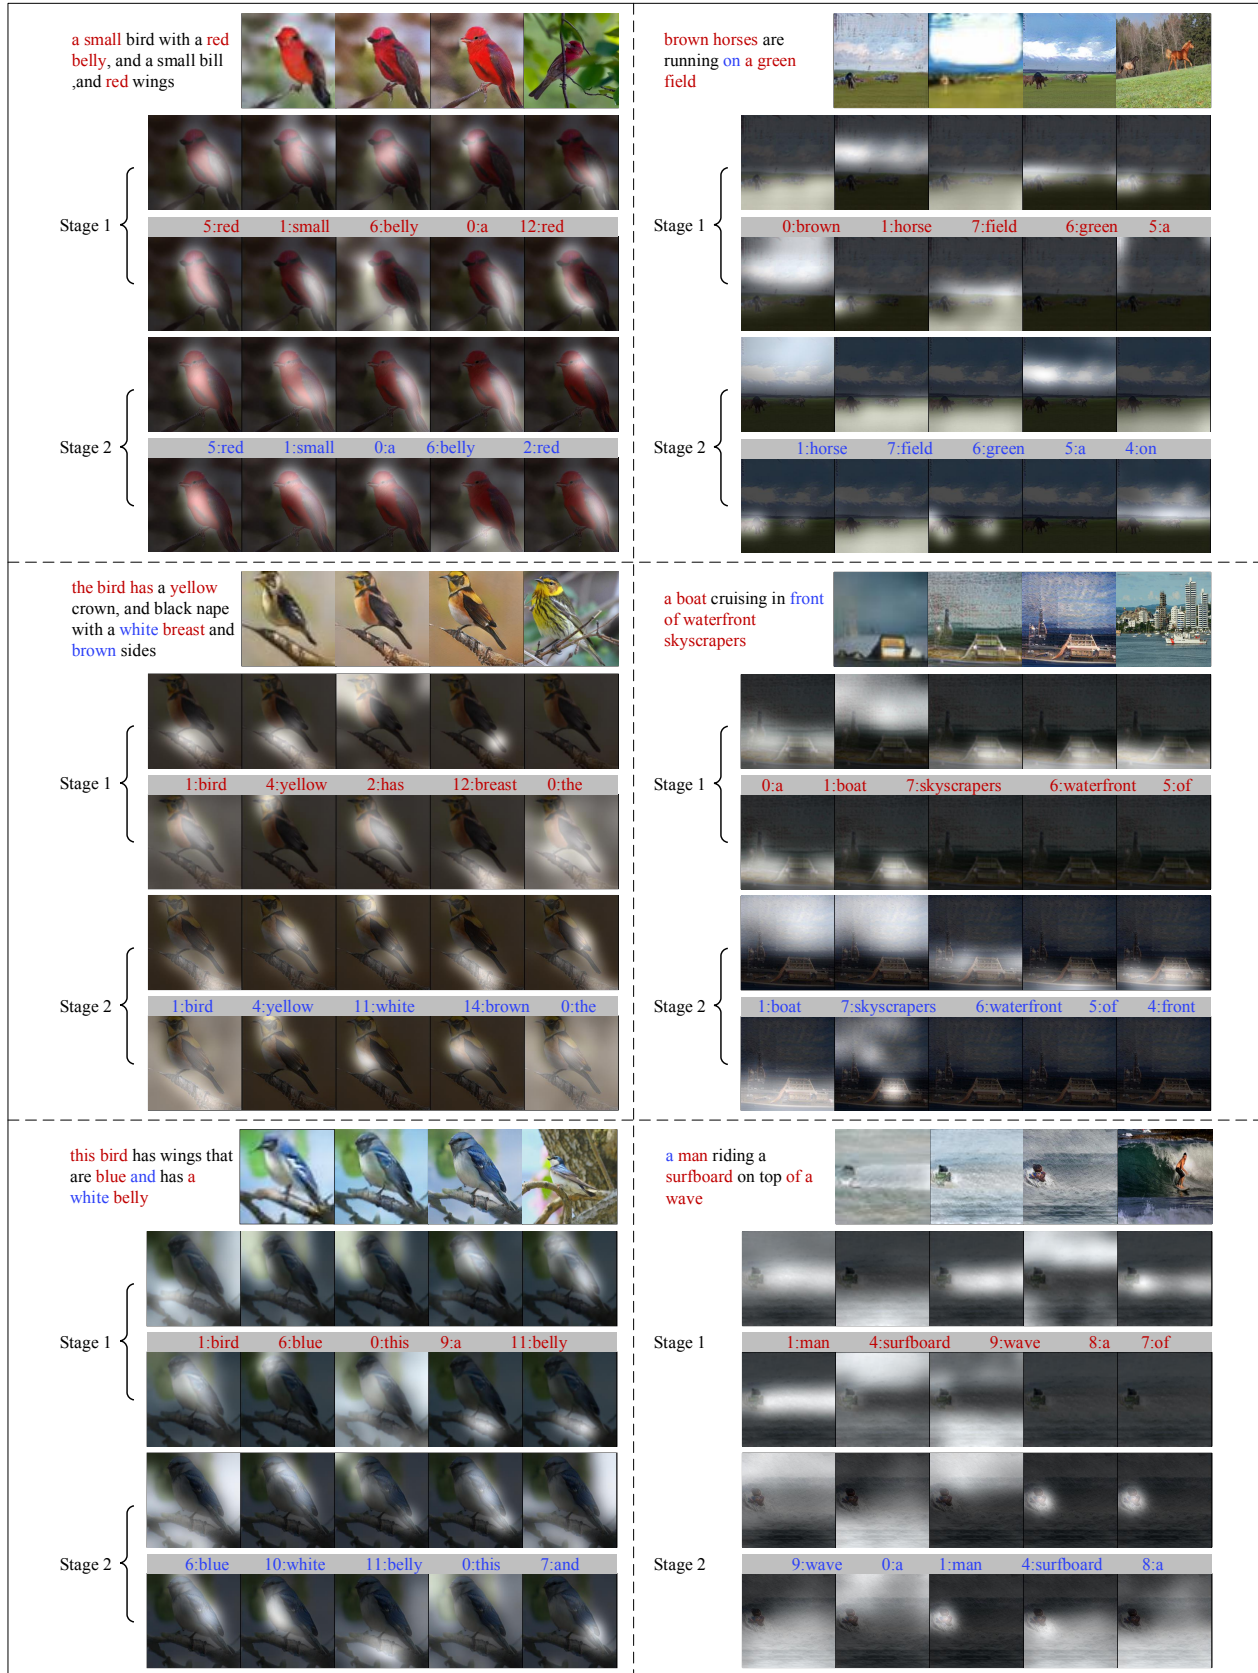

Figure 3: Attention visualization on the CUB and the COCO test sets (the supplementary material for Figure 5).

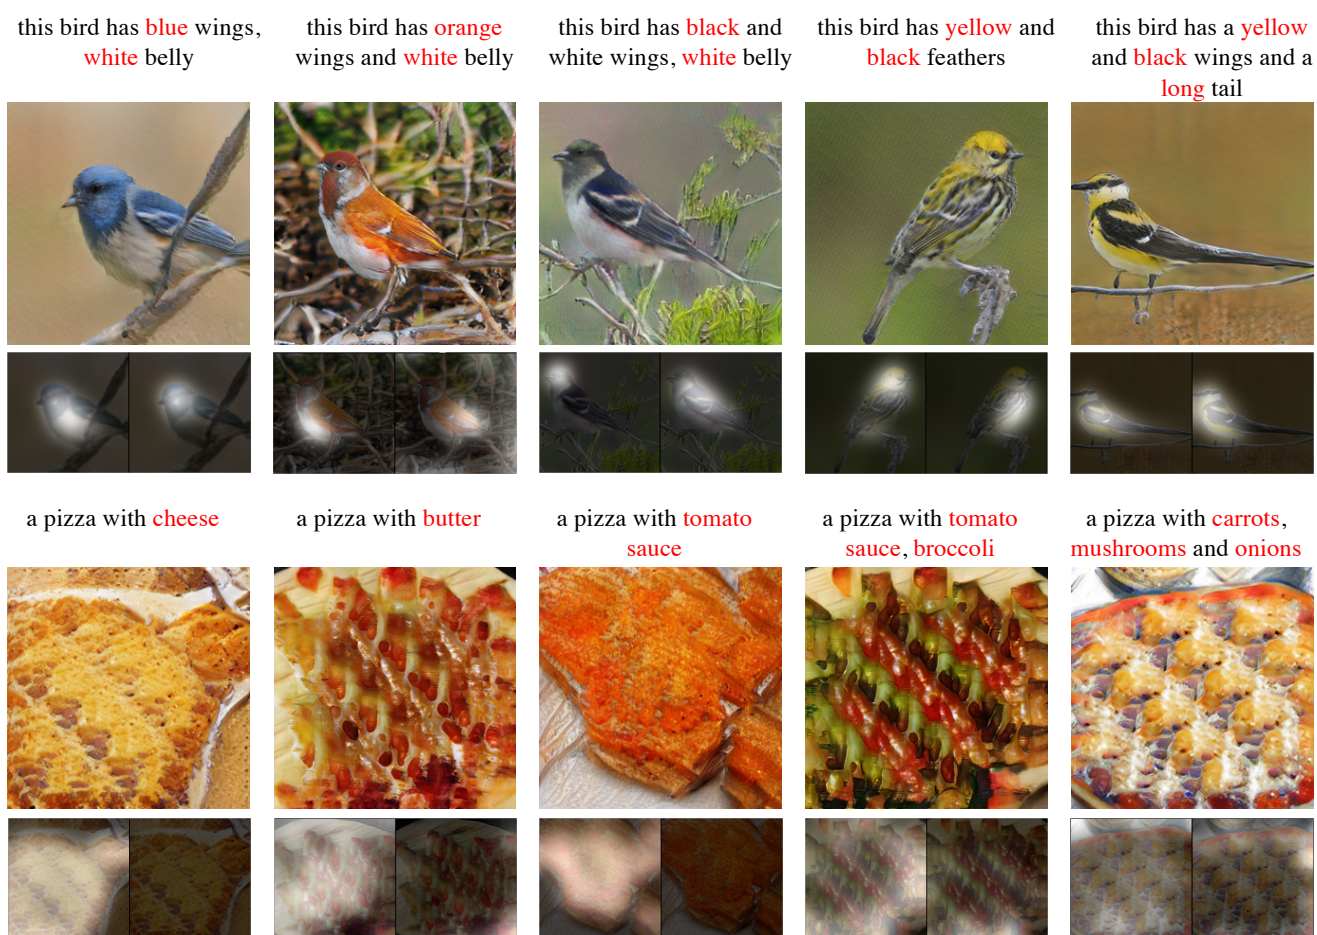

Figure 4: Images generated by MirrorGAN by modifying some words of the text descriptions and the corresponding top-2 attention maps in the last stage (the supplementary material for Figure 6). These examples show again that the COCO dataset is a very challenging dataset, however, MirrorGAN still captures the main textual feature of the input text and the generated images keep the semantic similarity.
